# Supplementary material for: Dugong dugon feeding in tropical Australian seagrass meadows: implications for conservation planning
Source: PeerJ. 2016 Jul 7;4:e2194. doi: 10.7717/peerj.2194 (PMC4941767; doi:10.7717/peerj.2194)
Supplement: Supplemental Information 1 [file peerj-04-2194-s003.xlsx]

## Sheet: 21.06
		Biomass					Seagrass Cover %				Species Biomass (g)								Width				Depth	Biomass	Species Biomass Removed
Number	Quadrat	1	2	3	4	Total (g)	HU	TH	SI	HO	HU	TH	SI	HO	Length (cm)	Width (cm)			Average	Depth (cm)			Average	Removed	HU	TH	SI	HO
1	0028	0	0	0	0.1	0.01	100	0	0	0	0.01	0	0	0	NA
2	0130	0.05	2.5	0.2	0.4	0.315	100	0	0	0	0.315	0	0	0	NA
3	0229	0.05	0.4	0.1	0.1	0.065	100	0	0	0	0.065	0	0	0	NA
4	0620	0.35	0.1	1	0.75	0.22	100	0	0	0	0.22	0	0	0	NA
5	0915	0.45	0.15	0.25	0.25	0.11	100	0	0	0	0.11	0	0	0	NA
6	1047	2.5	2.5	2.75	3.75	1.15	97	3	0	0	1.05	0.1	0	0	NA
7	1125	4	4.05	0.4	1	0.945	96.5	3	0	0.5	0.74	0.2	0	0.005	56.6	19.3	18.5	18.9	18.9	3.9	3.6	2.9	3.46667	0.10109	0.0791608	0.0213948	0	0.00053487
8	1304	0.4	0.1	0	0.05	0.055	98	0	0	2	0.05	0	0	0.005	NA
9	1506	0	0	0	0	0	0	0	0	0	0	0	0	0	NA
10	1516	3	3.95	3	2	1.195	97	0	3	0	1.075	0	0.12	0	52.5	17.4	14	15	15.4667	1.9	2.4	2.4	2.23333	0.097034	0.08729	0	0.009744	0
11	1522	5.5	2.75	2.75	2.75	1.375	90	10	0	0	1.125	0.25	0	0	NA
12	1722	2	0.7	0.35	0.05	0.31	100	0	0	0	0.31	0	0	0	NA
13	1937	3.2	3	4.1	2.95	1.325	96	2	0	2	1.205	0.1	0	0.02	NA
14	2143	4.2	2.05	3.8	1.95	1.2	75	5	0	20	0.91	0.2	0	0.09	NA
15	2204	3.25	2.05	3.75	2.25	1.13	94	5	0	1	1.02	0.1	0	0.01	88	25.4	23.2	18	22.2	3.2	1.9	1.9	2.33333	0.220757	0.199267	0.019536	0	0.0019536
16	2423	0.5	0	1.5	1.75	0.375	100	0	0	0	0.375	0	0	0	NA
17	2424	3.8	2.75	1.3	0.45	0.83	92	3	0	5	0.69	0.1	0	0.04	NA
18	3425	3.5	3	3	2.5	1.2	98	2	0	0	1.15	0.05	0	0	NA
19	3800	1.7	1.7	1.7	1.7	0.68	100	0	0	0	0.68	0	0	0	NA
20	4512	2.8	4.05	0.8	4.25	1.19	96	2	0	2	0.755	0.35	0	0.085	61.3	23	15	19	19	3.6	3.4	3.7	3.56667	0.138599	0.0879349	0.0407645	0	0.00989995
21	4220	0	0	1.75	2.5	0.425	100	0	0	0	0.425	0	0	0	NA
22	4346	2.9	5.5	1.35	2.65	1.24	85	10	0	5	0.79	0.25	0	0.2	92.5	15.9	18	14	15.9667	1.4	3.2	3.5	2.7	0.183138	0.116676	0.0369229	0	0.0295383
23	3032	3	3	7	2.6	1.56	100	0	0	0	1.56	0	0	0	110.5	17	19	20	18.6667	2	3	2.5	2.5	0.321776	0.321776	0	0	0
24	3548	6	4	3	1	1.4	70	30	0	0	0.95	0.45	0	0	NA
25	3634	6.1	6.1	5	6.7	2.39	96.5	1	0	2.5	1.7	0.5	0	0.19	NA
						0.8278	91.24	3.04	0.12	1.6	0.6912	0.106	0.0048	0.0258	6 feeding trails
Comments:		quadrat numbers 9 and 19 have no photo due to water on quadrat
		thes two quadrats have been excluded from the analysis

## Sheet: 18.07
		Biomass					Seagrass Cover %				Species Biomass (g)								Widht				Length	Biomass	Species Biomass Removed
Number	Quadrat	1	2	3	4	Total (g)	HU	CS	SI	HO	HU	CS	SI	HO	Length (cm)	Width (cm)			Average	Depth (cm)			Average	Removed	HU	CS	SI	HO
1	0241	2	2	2	2	0.8	0	100	0	0	0	0.8	0	0	NA
2	0634	1.8	0.9	0.9	0.2	0.38	60	40	0	0	0.205	0.175	0	0	131	15.4	12.5	12.6	13.5	3.5	4	4.5	4	0.067203	0.0362543	0.0309487	0	0
3	0750	0.9	0.9	0.9	0.9	0.36	0	100	0	0	0	0.36	0	0	NA
4	0402	0.15	0.1	0.1	0.45	0.08	100	0	0	0	0.08	0	0	0	NA
5	0802	2.5	0.8	2.5	2.5	0.83	70	10	0	20	0.7	0.1	0	0.03	NA
6	1202	4	3	3	4	1.4	50	50	0	0	0.45	0.95	0	0	NA
7	1902	2.6	3	4.1	2.1	1.18	75	20	0	5	0.75	0.4	0	0.03	NA
8	0820	1	1	1	1	0.4	100	0	0	0	0.4	0	0	0	NA
9	0829	2.75	0.75	3.75	2.75	1	75	25	0	0	0.88	0.12	0	0	NA
10	1650	2.5	3.5	0.75	2	0.875	15	85	0	0	0.175	0.7	0	0	NA
11	2043	2.75	1.7	2.7	2.25	0.94	85	15	0	0	0.765	0.175	0	0	NA
12	2048	1	0.15	0.15	0.15	0.145	90	0	0	10	0.12	0	0	0.025	NA
13	2439	1	2	5.5	3	1.15	90	10	0	0	0.9	0.25	0	0	NA
14	2432	2.75	3	1.75	5	1.25	70	25	5	0	0.9	0.35	0.025	0	NA
15	2827	3.1	0.2	0.25	0.25	0.38	75	0	0	25	0.32	0	0	0.06	NA
16	3026	1.75	0.9	0.45	0.7	0.38	25	0	0	75	0.14	0	0	0.24	115.9	15.5	15	14.5	15	3	1.5	1	1.83333	0.066063	0.024339	0	0	0.041724
17	3039	2.75	3.2	0.45	1.2	0.76	90	10	0	0	0.64	0.12	0	0	NA
18	3046	1.5	0.75	2.2	0.4	0.485	95	5	0	0	0.425	0.06	0	0	NA
19	3236	3.75	4	5	5	1.775	80	20	0	0	1.55	0.225	0	0	NA
20	3300	3.25	1.3	0.8	1.3	0.665	87	0	3	10	0.515	0	0.065	0.085	171.2	17.9	16.8	16.1	16.9333	3	2.6	2	2.53333	0.192783	0.149298	0	0.0188434	0.0246414
21	3301	1.85	1	0.75	1.4	0.5	75	0	5	20	0.415	0	0.03	0.055	178	18.5	16.5	17.5	17.5	3.1	3.7	2.8	3.2	0.15575	0.129273	0	0.009345	0.0171325
22	3500	1	3.5	5	3	1.25	100	0	0	0	1.25	0	0	0	66	16	17.2	15.2	16.1333	1.5	0	0	0.5	0.1331	0.1331	0	0	0
23	3524	2.5	2.8	3.4	2	1.07	70	15	0	15	0.65	0.31	0	0.11	NA
24	3813	1.2	2	2.05	0.3	0.555	90	5	0	5	0.45	0.1	0	0.005	NA
25	3630	4	2.5	3	3.5	1.3	95	5	0	0	1.2	0.1	0	0	NA
26	4248	2.85	0.8	1.4	0.95	0.6	68	2	0	30	0.315	0.075	0	0.21	NA
27	4342	1.95	1.4	1.4	0.4	0.515	20	15	0	65	0.165	0.12	0	0.23	NA
28	4531	2.2	3.2	1.75	4	1.115	100	0	0	0	1.115	0	0	0	NA
29	4947	0	0.75	2.25	3.3	0.63	95	0	0	5	0.625	0	0	0.005	NA
30	4419	0.75	1.15	1.75	0.3	0.395	90	10	0	0	0.345	0.05	0	0	NA
						0.772167	71.1667	18.9	0.433333	9.5	0.548167	0.184667	0.004	0.0361667	5 feeding trails
Comments:		quadrat numbers 1, 3 and 8 do not have photos due to water in quadrat
		these quadrats have been removed from the analyis

## Sheet: 31.07
		Biomass					Seagrass Cover %		Species Biomass (g)						Width				Length	Biomass	Species Biomass Removed
Number	Quadrat	1	2	3	4	Total (g)	HU	HO	HU	HO	Length (cm)	Width (cm)			Average	Depth (cm)			Average	Removed	HU	HO
1	0905	4	4	3.5	5	1.65	100	0	1.65	0	18.7	14.6	13.2	12.7	13.5	1	2	2.5	1.83333	0.0416542	0.0416542	0
2	1200	5.5	5	4.55	4.6	1.965	65	35	1.85	0.115	87.9	12.6	8.3	8.1	9.66667	1	0.5	0	0.5	0.166966	0.157195	0.00977155
3	1400	5.25	4.75	5.1	4.55	1.965	85	15	1.9	0.065
4	1609	3.15	3.25	2.75	2.6	1.175	85	15	1.095	0.08
5	1704	1.3	0.85	1.8	1.65	0.56	50	50	0.36	0.2
6	2505	3	0.5	2.75	4.05	1.03	95	5	1.025	0.005
7	3502	4.5	3.8	4.2	4	1.65	90	10	1.635	0.015	42.7	18.4	13.2	9	13.5333	1.5	1.4	1	1.3	0.0953491	0.0944823	0.00086681
8	3705	0.5	1.75	0.75	1.5	0.45	100	0	0.45	0	42.2	5.6	7.2	7.2	6.66667	0.5	0.5	0.5	0.5	0.01266	0.01266	0
9	3904	1.75	0.6	0.75	0.55	0.365	90	10	0.355	0.01
10	4210	0.9	1.2	1.1	1	0.42	100	0	0.42	0
11	4311	3	3.6	2.25	4	1.285	90	10	1.22	0.065	74.4	12.9	16.3	18.7	15.9667	0.8	1.9	1.4	1.36667	0.152648	0.144926	0.00772148
12	4414	2.75	2.05	3.2	0.45	0.845	15	85	0.665	0.18	139.8	9.5	9.2	0.5	6.4	1	0.5	1	0.833333	0.0756038	0.0594989	0.016105
13	4608	2.2	1.05	1.15	2.4	0.68	15	80	0.52	0.16	111.1	16.9	13.1	15	15	4	2	2	2.66667	0.113322	0.086658	0.026664
14	5050	3.3	2.8	4.65	4.75	1.55	55	45	1.435	0.115
15	5037	5	3.35	2.85	3.3	1.45	95	5	1.415	0.035
16	4128	4.75	3.75	1.25	5.6	1.535	100	0	1.535	0
17	3744	4.5	3	3.2	2.95	1.365	95	5	1.36	0.005
18	3450	5.2	5.1	6	5.3	2.16	100	0	2.16	0
19	1650	2.75	3.5	2.8	3.8	1.285	50	50	0.905	0.38	65	12.2	15	10.5	12.5667	1	1.9	1	1.3	0.104963	0.0739234	0.0310397
20	1050	3	3.2	3.55	3.25	1.3	60	40	1.26	0.04	79.7	9.1	7	7.5	7.86667	2	1.8	2	1.93333	0.0815065	0.0789986	0.00250789
21	0450	2.2	2.9	4.1	3.7	1.29	90	10	1.265	0.025	116.5	12.5	15	17.8	15.1	0.7	2.5	1.5	1.56667	0.22693	0.222532	0.00439787
						1.2369	77.381	22.381	1.16571	0.0711905	10 feeding trails
Comments:		high epiphytes in some quadrats

## Sheet: 17.08
		Biomass					Seagrass Cover %				Species Biomass (g)
Number	Quadrat	1	2	3	4	Total (g)	HU	CS	TH	HO	HU	CS	TH	HO	Length (cm)	Width (cm)			Average	Depth (cm)			Average
1	0006	2.25				0.225	100	0	0	0	0.225	0	0	0	NA
2	0501	4.1				0.41	100	0	0	0	0.41	0	0	0	NA
3	0503	1.75				0.175	100	0	0	0	0.175	0	0	0	NA
4	1409	3.75				0.375	95	2	0	3			0		NA
5	2903	5.5				0.55	97	0	0	3		0	0		NA
6	3000	2.25				0.225	100	0	0	0	0.225	0	0	0	NA
7	3709	0.25				0.025	60	20	20	0				0	NA
8	4604	4.5				0.45	96	0	0	40		0	0		NA
9	4610	3				0.3	80	0	0	20		0	0		NA
10	4704	3.8				0.38	85	0	0	15		0	0		NA
11	0647	2.75				0.275	95	0	0	5		0	0		NA
12	0942	4.3				0.43	100	0	0	0	0.43	0	0	0	NA
13	0950	2				0.2	93	0	0	7		0	0		NA
14	1444	7.25				0.725	60	0	0	40		0	0		NA
15	1850	2.6				0.26	100	0	0	0	0.26	0	0	0	NA
16	4150	4.5				0.45	90	7	0	3			0		NA
17	1247	8				0.8	80	0	0	20		0	0		NA
18	1436	4.25				0.425	80	0	0	20		0	0		NA
19	2634	4.3				0.43	93	0	2	5		0			NA
20	2830	4.5				0.45	60	0	0	40		0	0		NA
21	3229	3.75				0.375	75	0	0	25		0	0		NA
22	3330	6.25				0.625	55	0	0	45		0	0		NA
23	4331	5.25				0.525	50	0	0	50		0	0		NA
24	4831	5				0.5	45	0	10	45		0			NA
25	0433	2.75				0.275	100	0	0	0	0.275	0	0	0	NA
26	2016	5				0.5	95	0	5	0		0			NA
27	2018	7.75				0.775	100	0	0	0	0.775	0	0	0	NA
28	2122	2.2				0.22	60	0	0	40		0	0		NA
29	1221	3				0.3	65	5	0	30			0		NA
30	4426	6.25				0.625	60	0	0	40		0	0		NA
						0.409333	82.3	1.13333	1.23333	16.5333	0.435	0	0	0	0 feeding trails

## Sheet: 31.08
		Biomass					Seagrass Cover %		Species Biomass (g)						Wedth				Length	Biomass	Species Biomass Removed
Number	Quadrat	1	2	3	4	Total (g)	HU	HO	HU	HO	Length (cm)	Width (cm)			Average	Depth (cm)			Average	Removed	HU	HO
1	0406	1	0.75	1.5	1.25	0.45	0	100	0	0.45
2	0315	1.25	3	0.9	0.2	0.535	50	50	0.475	0.06
3	0425	2.7	1.5	0.2	1.25	0.565	20	80	0.4	0.165	65.3	10.9	10.3	12.1	11.1	0.8	1	1	0.933333	0.0409529	0.0289932	0.0119597
4	1630	3.2	3.5	1.25	2	0.995	70	30	0.9	0.095	107.6	9	15.4	11.5	11.9667	1.4	0.5	0.5	0.8	0.128118	0.115885	0.0122323
5	1234	2.2	2	1.5	0.4	0.61	70	30	0.55	0.06
6	1037	1.75	1.75	0.5	1.5	0.55	40	60	0.42	0.13
7	0038	2	1	1.75	1.5	0.625	50	50	0.5	0.125
8	0542	2	1.5	0	0.5	0.4	80	20	0.38	0.02
9	0844	0.1	0.3	1.25	1	0.265	0	100	0	0.265
10	0349	0	0.9	1.2	0.9	0.3	5	95	0.05	0.25
11	0350	0	0	0.05	0.25	0.03	0	100	0	0.03
12	1850	1	1	1.25	0.1	0.335	75	25	0.3	0.035
13	2704	0	0	1.2	1.1	0.23	0	100	0	0.23
14	4908	1.25	1	1.25	2	0.55	85	15	0.52	0.03
15	4550	0.05	0	0	0	0.005	100	0	0.005	0
16	4050	1.5	1.5	1.6	1.5	0.61	0	100	0	0.61	44.6	13	12.7	15.4	13.7	1.5	1.5	2	1.66667	0.0372722	0	0.0372722
17	3847	1.1	2.5	2.6	1	0.72	15	85	0.075	0.645	140.3	17.3	14.2	17.3	16.2667	2	2	3.5	2.5	0.164319	0.0171166	0.147203
18	3840	2.5	1.25	1.2	1.1	0.605	10	90	0.12	0.485	217.6	17.3	16	23.8	19.0333	1.7	1.9	1.7	1.76667	0.25057	0.0496998	0.20087
19	3539	1.2	2	2.7	1.5	0.74	20	80	0.26	0.48	179.1	14	19	19	17.3333	2.5	2.5	0.7	1.9	0.229726	0.0807144	0.149011
20	3449	1.2	0.9	0.85	1.2	0.415	0	100	0	0.415	99.8	11.5	12	20.3	14.6	0.5	1	2.5	1.33333	0.0604688	0	0.0604688
21	2430	1.1	1	1.5	1.9	0.55	20	80	0.22	0.33	109.9	19.5	15.2	14.5	16.4	1	2	1	1.33333	0.0991298	0.0396519	0.0594779
22	2332	0	0	0.03	0	0.003	100	0	0.003	0
23	2235	0	0.03	0	0	0.003	100	0	0.003	0
24	4928	0	0.25	0	0	0.025	100	0	0.025	0
25	4921	0.3	0.4	1	0	0.17	100	0	0.17	0
26	3921	0.8	0	0	0.3	0.11	100	0	0.11	0
27	2919	0	0	0	0.01	0.001	100	0	0.001	0
28	2821	0.95	0.85	0.85	1	0.365	25	75	0.15	0.215
29	2423	0.3	0.15	0.3	0	0.075	60	40	0.065	0.01
30	2723	0.2	0	0	0	0.02	100	0	0.02	0
						0.3619	49.8333	50.1667	0.0998571	0.179286	8 feeding trails
Comments:		meadow on other side of sand-bar; feeding trails hard to see except when on top of them; seagrass meadow was very small biomass and very patchy and only HO/HU present

## Sheet: Biomass
Date	Biomass
21.06.2012	0.01
21.06.2012	0.315
21.06.2012	0.065
21.06.2012	0.22
21.06.2012	0.11
21.06.2012	1.15
21.06.2012	0.945
21.06.2012	0.055
21.06.2012	1.195
21.06.2012	1.375
21.06.2012	0.31
21.06.2012	1.325
21.06.2012	1.2
21.06.2012	1.13
21.06.2012	0.375
21.06.2012	0.83
21.06.2012	1.2
21.06.2012	1.19
21.06.2012	0.425
21.06.2012	1.24
21.06.2012	1.56
21.06.2012	1.4
21.06.2012	2.39
18.07.2012	0.38
18.07.2012	0.08
18.07.2012	0.83
18.07.2012	1.4
18.07.2012	1.18
18.07.2012	1
18.07.2012	0.875
18.07.2012	0.94
18.07.2012	0.145
18.07.2012	1.15
18.07.2012	1.25
18.07.2012	0.38
18.07.2012	0.38
18.07.2012	0.76
18.07.2012	0.485
18.07.2012	1.775
18.07.2012	0.665
18.07.2012	0.5
18.07.2012	1.25
18.07.2012	1.07
18.07.2012	0.555
18.07.2012	1.3
18.07.2012	0.6
18.07.2012	0.515
18.07.2012	1.115
18.07.2012	0.63
18.07.2012	0.395
31.07.2012	1.65
31.07.2012	1.965
31.07.2012	1.965
31.07.2012	1.175
31.07.2012	0.56
31.07.2012	1.03
31.07.2012	1.65
31.07.2012	0.45
31.07.2012	0.365
31.07.2012	0.42
31.07.2012	1.285
31.07.2012	0.845
31.07.2012	0.68
31.07.2012	1.55
31.07.2012	1.45
31.07.2012	1.535
31.07.2012	1.365
31.07.2012	2.16
31.07.2012	1.285
31.07.2012	1.3
31.07.2012	1.29
31.08.2012	0.45
31.08.2012	0.535
31.08.2012	0.565
31.08.2012	0.995
31.08.2012	0.61
31.08.2012	0.55
31.08.2012	0.625
31.08.2012	0.4
31.08.2012	0.265
31.08.2012	0.3
31.08.2012	0.03
31.08.2012	0.335
31.08.2012	0.23
31.08.2012	0.55
31.08.2012	0.005
31.08.2012	0.61
31.08.2012	0.72
31.08.2012	0.605
31.08.2012	0.74
31.08.2012	0.415
31.08.2012	0.55
31.08.2012	0.003
31.08.2012	0.003
31.08.2012	0.025
31.08.2012	0.17
31.08.2012	0.11
31.08.2012	0.001
31.08.2012	0.365
31.08.2012	0.075
31.08.2012	0.02

## Sheet: Species Percent
Date	Species	Percent.Cover		HU	CS	TH	SI	HO
21.06.2012	HU	100		100	40	0	0	0
21.06.2012	HU	100		100	0	0	0	0
21.06.2012	HU	100		100	10	0	0	0
21.06.2012	HU	100		100	50	0	0	0
21.06.2012	HU	100		100	20	0	0	0
21.06.2012	HU	97		97	25	3	0	0
21.06.2012	HU	96.5		96.5	85	3	0	0.5
21.06.2012	HU	98		98	15	0	0	2
21.06.2012	HU	0		97	0	0	3	0
21.06.2012	HU	97		90	10	10	0	0
21.06.2012	HU	90		100	25	0	0	0
21.06.2012	HU	100		96	0	2	0	2
21.06.2012	HU	96		75	0	5	0	20
21.06.2012	HU	75		94	10	5	0	1
21.06.2012	HU	94		100	5	0	0	0
21.06.2012	HU	100		92	20	3	0	5
21.06.2012	HU	92		98	0	2	0	0
21.06.2012	HU	98		96	0	2	0	2
21.06.2012	HU	100		100	0	0	0	0
21.06.2012	HU	96		85	15	10	0	5
21.06.2012	HU	100		100	5	0	0	0
21.06.2012	HU	85		70	5	30	0	0
21.06.2012	HU	100		96.5	2	1	0	2.5
21.06.2012	HU	70		60	15		0	0
21.06.2012	HU	96.5		100	0		0	0
21.06.2012	TH	0		70	0		0	20
21.06.2012	TH	0		50	10		0	0
21.06.2012	TH	0		75			0	5
21.06.2012	TH	0		75			0	0
21.06.2012	TH	0		15			0	0
21.06.2012	TH	3		85			0	0
21.06.2012	TH	3		90			0	10
21.06.2012	TH	0		90			0	0
21.06.2012	TH	0		70			5	0
21.06.2012	TH	0		75			0	25
21.06.2012	TH	10		25			0	75
21.06.2012	TH	0		90			0	0
21.06.2012	TH	2		95			0	0
21.06.2012	TH	5		80			0	0
21.06.2012	TH	5		87			3	10
21.06.2012	TH	0		75			5	20
21.06.2012	TH	3		100			0	0
21.06.2012	TH	2		70			0	15
21.06.2012	TH	0		90			0	5
21.06.2012	TH	2		95			0	0
21.06.2012	TH	0		68			0	30
21.06.2012	TH	10		20			0	65
21.06.2012	TH	0		100			0	0
21.06.2012	TH	30		95			0	5
21.06.2012	TH	1		90			0	0
21.06.2012	SI	0		100				0
21.06.2012	SI	0		65				35
21.06.2012	SI	0		85				15
21.06.2012	SI	0		85				15
21.06.2012	SI	0		50				50
21.06.2012	SI	0		95				5
21.06.2012	SI	0		90				10
21.06.2012	SI	0		100				0
21.06.2012	SI	0		90				10
21.06.2012	SI	3		100				0
21.06.2012	SI	0		90				10
21.06.2012	SI	0		15				85
21.06.2012	SI	0		15				80
21.06.2012	SI	0		55				45
21.06.2012	SI	0		95				5
21.06.2012	SI	0		100				0
21.06.2012	SI	0		95				5
21.06.2012	SI	0		100				0
21.06.2012	SI	0		50				50
21.06.2012	SI	0		60				40
21.06.2012	SI	0		90				10
21.06.2012	SI	0		0				100
21.06.2012	SI	0		50				50
21.06.2012	SI	0		20				80
21.06.2012	SI	0		70				30
21.06.2012	HO	0		70				30
21.06.2012	HO	0		40				60
21.06.2012	HO	0		50				50
21.06.2012	HO	0		80				20
21.06.2012	HO	0		0				100
21.06.2012	HO	0		5				95
21.06.2012	HO	0.5		0				100
21.06.2012	HO	2		75				25
21.06.2012	HO	0		0				100
21.06.2012	HO	0		85				15
21.06.2012	HO	0		100				0
21.06.2012	HO	0		0				100
21.06.2012	HO	2		15				85
21.06.2012	HO	20		10				90
21.06.2012	HO	1		20				80
21.06.2012	HO	0		0				100
21.06.2012	HO	5		20				80
21.06.2012	HO	0		100				0
21.06.2012	HO	0		100				0
21.06.2012	HO	2		100				0
21.06.2012	HO	0		100				0
21.06.2012	HO	5		100				0
21.06.2012	HO	0		100				0
21.06.2012	HO	0		25				75
21.06.2012	HO	2.5		60				40
18.07.2012	HU	0		100				0
18.07.2012	HU	60
18.07.2012	HU	0
18.07.2012	HU	100
18.07.2012	HU	70
18.07.2012	HU	50
18.07.2012	HU	75
18.07.2012	HU	100
18.07.2012	HU	75
18.07.2012	HU	15
18.07.2012	HU	85
18.07.2012	HU	90
18.07.2012	HU	90
18.07.2012	HU	70
18.07.2012	HU	75
18.07.2012	HU	25
18.07.2012	HU	90
18.07.2012	HU	95
18.07.2012	HU	80
18.07.2012	HU	87
18.07.2012	HU	75
18.07.2012	HU	100
18.07.2012	HU	70
18.07.2012	HU	90
18.07.2012	HU	95
18.07.2012	HU	68
18.07.2012	HU	20
18.07.2012	HU	100
18.07.2012	HU	95
18.07.2012	HU	90
18.07.2012	CS	100
18.07.2012	CS	40
18.07.2012	CS	100
18.07.2012	CS	0
18.07.2012	CS	10
18.07.2012	CS	50
18.07.2012	CS	20
18.07.2012	CS	0
18.07.2012	CS	25
18.07.2012	CS	85
18.07.2012	CS	15
18.07.2012	CS	0
18.07.2012	CS	10
18.07.2012	CS	25
18.07.2012	CS	0
18.07.2012	CS	0
18.07.2012	CS	10
18.07.2012	CS	5
18.07.2012	CS	20
18.07.2012	CS	0
18.07.2012	CS	0
18.07.2012	CS	0
18.07.2012	CS	15
18.07.2012	CS	5
18.07.2012	CS	5
18.07.2012	CS	2
18.07.2012	CS	15
18.07.2012	CS	0
18.07.2012	CS	0
18.07.2012	CS	10
18.07.2012	SI	0
18.07.2012	SI	0
18.07.2012	SI	0
18.07.2012	SI	0
18.07.2012	SI	0
18.07.2012	SI	0
18.07.2012	SI	0
18.07.2012	SI	0
18.07.2012	SI	0
18.07.2012	SI	0
18.07.2012	SI	0
18.07.2012	SI	0
18.07.2012	SI	0
18.07.2012	SI	5
18.07.2012	SI	0
18.07.2012	SI	0
18.07.2012	SI	0
18.07.2012	SI	0
18.07.2012	SI	0
18.07.2012	SI	3
18.07.2012	SI	5
18.07.2012	SI	0
18.07.2012	SI	0
18.07.2012	SI	0
18.07.2012	SI	0
18.07.2012	SI	0
18.07.2012	SI	0
18.07.2012	SI	0
18.07.2012	SI	0
18.07.2012	SI	0
18.07.2012	HO	0
18.07.2012	HO	0
18.07.2012	HO	0
18.07.2012	HO	0
18.07.2012	HO	20
18.07.2012	HO	0
18.07.2012	HO	5
18.07.2012	HO	0
18.07.2012	HO	0
18.07.2012	HO	0
18.07.2012	HO	0
18.07.2012	HO	10
18.07.2012	HO	0
18.07.2012	HO	0
18.07.2012	HO	25
18.07.2012	HO	75
18.07.2012	HO	0
18.07.2012	HO	0
18.07.2012	HO	0
18.07.2012	HO	10
18.07.2012	HO	20
18.07.2012	HO	0
18.07.2012	HO	15
18.07.2012	HO	5
18.07.2012	HO	0
18.07.2012	HO	30
18.07.2012	HO	65
18.07.2012	HO	0
18.07.2012	HO	5
18.07.2012	HO	0
31.07.2012	HU	100
31.07.2012	HU	65
31.07.2012	HU	85
31.07.2012	HU	85
31.07.2012	HU	50
31.07.2012	HU	95
31.07.2012	HU	90
31.07.2012	HU	100
31.07.2012	HU	90
31.07.2012	HU	100
31.07.2012	HU	90
31.07.2012	HU	15
31.07.2012	HU	15
31.07.2012	HU	55
31.07.2012	HU	95
31.07.2012	HU	100
31.07.2012	HU	95
31.07.2012	HU	100
31.07.2012	HU	50
31.07.2012	HU	60
31.07.2012	HU	90
31.07.2012	HO	0
31.07.2012	HO	35
31.07.2012	HO	15
31.07.2012	HO	15
31.07.2012	HO	50
31.07.2012	HO	5
31.07.2012	HO	10
31.07.2012	HO	0
31.07.2012	HO	10
31.07.2012	HO	0
31.07.2012	HO	10
31.07.2012	HO	85
31.07.2012	HO	80
31.07.2012	HO	45
31.07.2012	HO	5
31.07.2012	HO	0
31.07.2012	HO	5
31.07.2012	HO	0
31.07.2012	HO	50
31.07.2012	HO	40
31.07.2012	HO	10
31.08.2012	HU	0
31.08.2012	HU	50
31.08.2012	HU	20
31.08.2012	HU	70
31.08.2012	HU	70
31.08.2012	HU	40
31.08.2012	HU	50
31.08.2012	HU	80
31.08.2012	HU	0
31.08.2012	HU	5
31.08.2012	HU	0
31.08.2012	HU	75
31.08.2012	HU	0
31.08.2012	HU	85
31.08.2012	HU	100
31.08.2012	HU	0
31.08.2012	HU	15
31.08.2012	HU	10
31.08.2012	HU	20
31.08.2012	HU	0
31.08.2012	HU	20
31.08.2012	HU	100
31.08.2012	HU	100
31.08.2012	HU	100
31.08.2012	HU	100
31.08.2012	HU	100
31.08.2012	HU	100
31.08.2012	HU	25
31.08.2012	HU	60
31.08.2012	HU	100
31.08.2012	HO	100
31.08.2012	HO	50
31.08.2012	HO	80
31.08.2012	HO	30
31.08.2012	HO	30
31.08.2012	HO	60
31.08.2012	HO	50
31.08.2012	HO	20
31.08.2012	HO	100
31.08.2012	HO	95
31.08.2012	HO	100
31.08.2012	HO	25
31.08.2012	HO	100
31.08.2012	HO	15
31.08.2012	HO	0
31.08.2012	HO	100
31.08.2012	HO	85
31.08.2012	HO	90
31.08.2012	HO	80
31.08.2012	HO	100
31.08.2012	HO	80
31.08.2012	HO	0
31.08.2012	HO	0
31.08.2012	HO	0
31.08.2012	HO	0
31.08.2012	HO	0
31.08.2012	HO	0
31.08.2012	HO	75
31.08.2012	HO	40
31.08.2012	HO	0

## Sheet: Species Biomass
Date	Species	Biomass		HU	CS	TH	SI	HO
21.06.2012	HU	0.01		0.01	0.8	0	0	0
21.06.2012	HU	0.315		0.315	0.175	0	0	0
21.06.2012	HU	0.065		0.065	0.36	0	0	0
21.06.2012	HU	0.22		0.22	0	0	0	0
21.06.2012	HU	0.11		0.11	0.1	0	0	0
21.06.2012	HU	1.05		1.05	0.95	0.1	0	0
21.06.2012	HU	0.74		0.74	0.4	0.2	0	0.005
21.06.2012	HU	0.05		0.05	0	0	0	0.005
21.06.2012	HU	0		0	0.12	0	0	0
21.06.2012	HU	1.075		1.075	0.7	0	0.12	0
21.06.2012	HU	1.125		1.125	0.175	0.25	0	0
21.06.2012	HU	0.31		0.31	0	0	0	0
21.06.2012	HU	1.205		1.205	0.25	0.1	0	0.02
21.06.2012	HU	0.91		0.91	0.35	0.2	0	0.09
21.06.2012	HU	1.02		1.02	0	0.1	0	0.01
21.06.2012	HU	0.375		0.375	0	0	0	0
21.06.2012	HU	0.69		0.69	0.12	0.1	0	0.04
21.06.2012	HU	1.15		1.15	0.06	0.05	0	0
21.06.2012	HU	0.68		0.68	0.225	0	0	0
21.06.2012	HU	0.755		0.755	0	0.35	0	0.085
21.06.2012	HU	0.425		0.425	0	0	0	0
21.06.2012	HU	0.79		0.79	0	0.25	0	0.2
21.06.2012	HU	1.56		1.56	0.31	0	0	0
21.06.2012	HU	0.95		0.95	0.1	0.45	0	0
21.06.2012	HU	1.7		1.7	0.1	0.5	0	0.19
21.06.2012	TH	0		0	0.075		0	0
21.06.2012	TH	0		0.205	0.12		0	0
21.06.2012	TH	0		0	0		0	0
21.06.2012	TH	0		0.08	0		0	0
21.06.2012	TH	0		0.7	0.05		0	0.03
21.06.2012	TH	0.1		0.45			0	0
21.06.2012	TH	0.2		0.75			0	0.03
21.06.2012	TH	0		0.4			0	0
21.06.2012	TH	0		0.88			0	0
21.06.2012	TH	0		0.175			0	0
21.06.2012	TH	0.25		0.765			0	0
21.06.2012	TH	0		0.12			0	0.025
21.06.2012	TH	0.1		0.9			0	0
21.06.2012	TH	0.2		0.9			0.025	0
21.06.2012	TH	0.1		0.32			0	0.06
21.06.2012	TH	0		0.14			0	0.24
21.06.2012	TH	0.1		0.64			0	0
21.06.2012	TH	0.05		0.425			0	0
21.06.2012	TH	0		1.55			0	0
21.06.2012	TH	0.35		0.515			0.065	0.085
21.06.2012	TH	0		0.415			0.03	0.055
21.06.2012	TH	0.25		1.25			0	0
21.06.2012	TH	0		0.65			0	0.11
21.06.2012	TH	0.45		0.45			0	0.005
21.06.2012	TH	0.5		1.2			0	0
21.06.2012	SI	0		0.315			0	0.21
21.06.2012	SI	0		0.165			0	0.23
21.06.2012	SI	0		1.115			0	0
21.06.2012	SI	0		0.625			0	0.005
21.06.2012	SI	0		0.345			0	0
21.06.2012	SI	0		1.65				0
21.06.2012	SI	0		1.85				0.115
21.06.2012	SI	0		1.9				0.065
21.06.2012	SI	0		1.095				0.08
21.06.2012	SI	0.12		0.36				0.2
21.06.2012	SI	0		1.025				0.005
21.06.2012	SI	0		1.635				0.015
21.06.2012	SI	0		0.45				0
21.06.2012	SI	0		0.355				0.01
21.06.2012	SI	0		0.42				0
21.06.2012	SI	0		1.22				0.065
21.06.2012	SI	0		0.665				0.18
21.06.2012	SI	0		0.52				0.16
21.06.2012	SI	0		1.435				0.115
21.06.2012	SI	0		1.415				0.035
21.06.2012	SI	0		1.535				0
21.06.2012	SI	0		1.36				0.005
21.06.2012	SI	0		2.16				0
21.06.2012	SI	0		0.905				0.38
21.06.2012	SI	0		1.26				0.04
21.06.2012	HO	0		1.265				0.025
21.06.2012	HO	0		0				0.45
21.06.2012	HO	0		0.475				0.06
21.06.2012	HO	0		0.4				0.165
21.06.2012	HO	0		0.9				0.095
21.06.2012	HO	0		0.55				0.06
21.06.2012	HO	0.005		0.42				0.13
21.06.2012	HO	0.005		0.5				0.125
21.06.2012	HO	0		0.38				0.02
21.06.2012	HO	0		0				0.265
21.06.2012	HO	0		0.05				0.25
21.06.2012	HO	0		0				0.03
21.06.2012	HO	0.02		0.3				0.035
21.06.2012	HO	0.09		0				0.23
21.06.2012	HO	0.01		0.52				0.03
21.06.2012	HO	0		0.005				0
21.06.2012	HO	0.04		0				0.61
21.06.2012	HO	0		0.075				0.645
21.06.2012	HO	0		0.12				0.485
21.06.2012	HO	0.085		0.26				0.48
21.06.2012	HO	0		0				0.415
21.06.2012	HO	0.2		0.22				0.33
21.06.2012	HO	0		0.003				0
21.06.2012	HO	0		0.003				0
21.06.2012	HO	0.19		0.025				0
18.07.2012	HU	0		0.17				0
18.07.2012	HU	0.205		0.11				0
18.07.2012	HU	0		0.001				0
18.07.2012	HU	0.08		0.15				0.215
18.07.2012	HU	0.7		0.065				0.01
18.07.2012	HU	0.45		0.02				0
18.07.2012	HU	0.75
18.07.2012	HU	0.4
18.07.2012	HU	0.88
18.07.2012	HU	0.175
18.07.2012	HU	0.765
18.07.2012	HU	0.12
18.07.2012	HU	0.9
18.07.2012	HU	0.9
18.07.2012	HU	0.32
18.07.2012	HU	0.14
18.07.2012	HU	0.64
18.07.2012	HU	0.425
18.07.2012	HU	1.55
18.07.2012	HU	0.515
18.07.2012	HU	0.415
18.07.2012	HU	1.25
18.07.2012	HU	0.65
18.07.2012	HU	0.45
18.07.2012	HU	1.2
18.07.2012	HU	0.315
18.07.2012	HU	0.165
18.07.2012	HU	1.115
18.07.2012	HU	0.625
18.07.2012	HU	0.345
18.07.2012	CS	0.8
18.07.2012	CS	0.175
18.07.2012	CS	0.36
18.07.2012	CS	0
18.07.2012	CS	0.1
18.07.2012	CS	0.95
18.07.2012	CS	0.4
18.07.2012	CS	0
18.07.2012	CS	0.12
18.07.2012	CS	0.7
18.07.2012	CS	0.175
18.07.2012	CS	0
18.07.2012	CS	0.25
18.07.2012	CS	0.35
18.07.2012	CS	0
18.07.2012	CS	0
18.07.2012	CS	0.12
18.07.2012	CS	0.06
18.07.2012	CS	0.225
18.07.2012	CS	0
18.07.2012	CS	0
18.07.2012	CS	0
18.07.2012	CS	0.31
18.07.2012	CS	0.1
18.07.2012	CS	0.1
18.07.2012	CS	0.075
18.07.2012	CS	0.12
18.07.2012	CS	0
18.07.2012	CS	0
18.07.2012	CS	0.05
18.07.2012	SI	0
18.07.2012	SI	0
18.07.2012	SI	0
18.07.2012	SI	0
18.07.2012	SI	0
18.07.2012	SI	0
18.07.2012	SI	0
18.07.2012	SI	0
18.07.2012	SI	0
18.07.2012	SI	0
18.07.2012	SI	0
18.07.2012	SI	0
18.07.2012	SI	0
18.07.2012	SI	0.025
18.07.2012	SI	0
18.07.2012	SI	0
18.07.2012	SI	0
18.07.2012	SI	0
18.07.2012	SI	0
18.07.2012	SI	0.065
18.07.2012	SI	0.03
18.07.2012	SI	0
18.07.2012	SI	0
18.07.2012	SI	0
18.07.2012	SI	0
18.07.2012	SI	0
18.07.2012	SI	0
18.07.2012	SI	0
18.07.2012	SI	0
18.07.2012	SI	0
18.07.2012	HO	0
18.07.2012	HO	0
18.07.2012	HO	0
18.07.2012	HO	0
18.07.2012	HO	0.03
18.07.2012	HO	0
18.07.2012	HO	0.03
18.07.2012	HO	0
18.07.2012	HO	0
18.07.2012	HO	0
18.07.2012	HO	0
18.07.2012	HO	0.025
18.07.2012	HO	0
18.07.2012	HO	0
18.07.2012	HO	0.06
18.07.2012	HO	0.24
18.07.2012	HO	0
18.07.2012	HO	0
18.07.2012	HO	0
18.07.2012	HO	0.085
18.07.2012	HO	0.055
18.07.2012	HO	0
18.07.2012	HO	0.11
18.07.2012	HO	0.005
18.07.2012	HO	0
18.07.2012	HO	0.21
18.07.2012	HO	0.23
18.07.2012	HO	0
18.07.2012	HO	0.005
18.07.2012	HO	0
31.07.2012	HU	1.65
31.07.2012	HU	1.85
31.07.2012	HU	1.9
31.07.2012	HU	1.095
31.07.2012	HU	0.36
31.07.2012	HU	1.025
31.07.2012	HU	1.635
31.07.2012	HU	0.45
31.07.2012	HU	0.355
31.07.2012	HU	0.42
31.07.2012	HU	1.22
31.07.2012	HU	0.665
31.07.2012	HU	0.52
31.07.2012	HU	1.435
31.07.2012	HU	1.415
31.07.2012	HU	1.535
31.07.2012	HU	1.36
31.07.2012	HU	2.16
31.07.2012	HU	0.905
31.07.2012	HU	1.26
31.07.2012	HU	1.265
31.07.2012	HO	0
31.07.2012	HO	0.115
31.07.2012	HO	0.065
31.07.2012	HO	0.08
31.07.2012	HO	0.2
31.07.2012	HO	0.005
31.07.2012	HO	0.015
31.07.2012	HO	0
31.07.2012	HO	0.01
31.07.2012	HO	0
31.07.2012	HO	0.065
31.07.2012	HO	0.18
31.07.2012	HO	0.16
31.07.2012	HO	0.115
31.07.2012	HO	0.035
31.07.2012	HO	0
31.07.2012	HO	0.005
31.07.2012	HO	0
31.07.2012	HO	0.38
31.07.2012	HO	0.04
31.07.2012	HO	0.025
31.08.2012	HU	0
31.08.2012	HU	0.475
31.08.2012	HU	0.4
31.08.2012	HU	0.9
31.08.2012	HU	0.55
31.08.2012	HU	0.42
31.08.2012	HU	0.5
31.08.2012	HU	0.38
31.08.2012	HU	0
31.08.2012	HU	0.05
31.08.2012	HU	0
31.08.2012	HU	0.3
31.08.2012	HU	0
31.08.2012	HU	0.52
31.08.2012	HU	0.005
31.08.2012	HU	0
31.08.2012	HU	0.075
31.08.2012	HU	0.12
31.08.2012	HU	0.26
31.08.2012	HU	0
31.08.2012	HU	0.22
31.08.2012	HU	0.003
31.08.2012	HU	0.003
31.08.2012	HU	0.025
31.08.2012	HU	0.17
31.08.2012	HU	0.11
31.08.2012	HU	0.001
31.08.2012	HU	0.15
31.08.2012	HU	0.065
31.08.2012	HU	0.02
31.08.2012	HO	0.45
31.08.2012	HO	0.06
31.08.2012	HO	0.165
31.08.2012	HO	0.095
31.08.2012	HO	0.06
31.08.2012	HO	0.13
31.08.2012	HO	0.125
31.08.2012	HO	0.02
31.08.2012	HO	0.265
31.08.2012	HO	0.25
31.08.2012	HO	0.03
31.08.2012	HO	0.035
31.08.2012	HO	0.23
31.08.2012	HO	0.03
31.08.2012	HO	0
31.08.2012	HO	0.61
31.08.2012	HO	0.645
31.08.2012	HO	0.485
31.08.2012	HO	0.48
31.08.2012	HO	0.415
31.08.2012	HO	0.33
31.08.2012	HO	0
31.08.2012	HO	0
31.08.2012	HO	0
31.08.2012	HO	0
31.08.2012	HO	0
31.08.2012	HO	0
31.08.2012	HO	0.215
31.08.2012	HO	0.01
31.08.2012	HO	0
