# Supplementary material for: Dugong dugon feeding in tropical Australian seagrass meadows: implications for conservation planning
Source: PeerJ. 2016 Jul 7;4:e2194. doi: 10.7717/peerj.2194 (PMC4941767; doi:10.7717/peerj.2194)
Supplement: Supplemental Information 3 [file peerj-04-2194-s005.xlsx]

## Sheet: 03.06
		Biomass Rank					Seagrass Cover %		Species Biomass (g)
Number	Quadrat	1	2	3	4	Total (g)	HO	HU	HO	HU	Length (cm)	Width (cm)			Average	Depth (cm)			Average
1	5026	6.55	6.7	6.7	6.2	2.615	80	20	0.68	1.935	NA
2	4924	6.7	6.8	6.95	6.8	2.725	65	35	0.705	2.02	NA
3	4646	0.05	0	0.65	1.1	0.18	40	60	0.08	0.1	NA
4	4349	7.05	7.3	7.2	6.95	2.85	50	50	0.61	2.24	NA
5	4106	6.3	6.45	2.75	4.25	1.975	70	30	0.65	1.325	220.1	26	12	10.5	16.1667	0.9	1.1	1.5	1.16667
6	4029	1.2	2.5	0.35	1.2	0.525	99	1	0.475	0.05	NA
7	3919	1.95	1.3	1.75	2.2	0.72	60	40	0.435	0.285	NA
8	3843	4	4	3.9	3.9	1.58	60	40	0.8	0.78	NA
9	3516	4.8	4.7	3.75	3.5	1.675	70	30	0.9	0.775	118	14.5	18	16.6	16.3667	1.1	1.6	1.5	1.4
10	3327	4	4.15	4.6	3.9	1.665	75	25	0.97	0.695	NA
11	3013	3.7	1.95	1.75	3.65	1.105	77	23	0.595	0.51	124.5	15	18.4	18	17.1333	0.7	1.2	1.6	1.16667
12	2845	2.9	3.1	6	6.4	1.84	55	45	0.79	1.05	NA
13	2540	6.9	8.8	4.5	4.5	2.47	65	35	0.76	1.71	NA
14	2514	9.2	9.2	9.2	9.2	3.68	50	50	0.8	2.88	109.4	17.8	11	24	17.6	1	1	1.2	1.06667
15	2250	8.9	9	6.85	8.45	3.32	40	60	0.6	2.72	NA
16	2227	2	1.95	1.6	1.8	0.735	98	2	0.705	0.03	NA
17	2202	9.15	8.25	7.2	6.75	3.135	40	60	0.725	2.41	149	15	20	23	19.3333	2.9	2.8	2.4	2.7
18	1621	4	2.1	2.5	2.2	1.08	80	20	0.83	0.25	33.4	18	19.7	17.7	18.4667	1.9	1.8	1.4	1.7
19	1535	0.2	1.45	0.3	1.55	0.35	95	5	0.305	0.045	NA
20	1527	2.1	2.1	2.15	2.1	0.845	95	5	0.77	0.075	NA
21	1239	2.05	1.9	1.5	1.9	0.735	95	5	0.65	0.085	NA
						1.705	69.4762	30.5238	0.65881	1.04619	6 feeding trails

## Sheet: 02.07
		Biomass Rank					Seagrass Cover %		Species Biomass (g)
Number	Quadrat	1	2	3	4	Total (g)	HO	HU	HO	HU	Length (cm)	Width (cm)			Average	Depth (cm)			Average
1	0013	4	1.8	1.55	1.25	0.86	70	30	0.645	0.215	NA
2	0114	7.1	7.1	7.1	7.1	2.84	40	60	0.8	2.04	NA
3	0201	1.8	1.55	1.9	2.9	0.815	85	15	0.675	0.14	216.7	22.5	20	14	18.8333	1.7	1.1	0.5	1.1
4	0219	6.7	8.7	6.5	6.65	2.855	49	51	0.655	2.2	NA
5	0710	4.5	5	5	5	1.95	98	2	0.15	1.8	145	15	15.8	15	15.2667	3.4	2.6	2.5	2.83333
6	0920	1.75	1.75	1.6	1.6	0.67	99	1	0.665	0.005	NA
7	1511	2	1.8	1.75	1.65	0.72	96	4	0.675	0.045	NA
8	2413	7	1.7	1.7	1.6	1.2	81	19	0.56	0.64	NA
9	3717	3	3.5	2.1	3.2	1.18	80	20	0.8	0.38	44.1	9	9.5	12.3	10.2667	1.9	1.7	1	1.53333
10	4209	1.8	1.8	1.8	1.8	0.72	97	3	0.7	0.02	44.1	18.5	20.7	24	21.0667	0.5	1	1.2	0.9
11	4412	8	7	7.5	8.7	3.12	50	50	0.51	2.61	NA
12	4612	2.6	2.55	2.3	2.05	0.95	70	30	0.595	0.355	NA
13	0222	7.5	8	7.5	6	2.9	30	70	0.8	2.1	86.6	15	14	14.5	14.5	2	1.8	1.9	1.9
14	1401	1.9	1.7	1.8	3.5	0.89	75	25	0.68	0.21	45.8	17	18	15	16.6667	3.2	2	1.9	2.36667
15	1428	2.05	7	6.75	6.75	2.255	54	46	0.725	1.53	NA
16	2724	6.8	2.05	1.8	1.75	1.24	75	25	0.685	0.555	NA
17	3124	6	8.2	1.8	0.35	1.635	25	75	0.43	1.205	NA
18	4628	2.1	3	2.95	2.2	1.025	90	10	0.775	0.25	NA
19	5029	3	2.1	2.2	2.1	0.94	97	3	0.8	0.14	NA
20	2839	2.75	4.1	2.25	2.3	1.14	86	14	0.73	0.41	NA
21	3037	7	7	7	7	2.8	75	25	0.7	2.1	NA
22	3237	7.5	7.5	7.5	7.5	3	30	70	0.5	2.5	NA
23	3930	8.3	4.5	8.75	7.6	2.915	50	50	0.715	2.2	NA
24	4039	1.4	3.3	3.2	6.2	1.41	52	48	0.35	1.06	NA
25	4835	8.05	6.95	4.1	3.6	2.27	60	40	0.68	1.59	NA
26	4241	7.2	7.2	7.2	7.2	2.88	25	75	0.4	2.48	NA
28	0139	0.15	0.3	0	0.1	0.055	0	100	0	0.055	NA
29	0145	0	0	0	0.3	0.03	0	100	0	0.03	NA
30	2050	0.3	0.15	0.25	0.1	0.08	45	55	0.02	0.06	NA
31	4303	7.5	5.25	2.1	8	2.285	45	55	0.635	1.65	104.2	11.5	19.6	18	16.3667	1	1	1.4	1.13333
32	0603	1.85	1.8	2.15	3.3	0.91	90	10	0.76	0.15	217.5	11.4	11.6	12	11.6667	2	1.5	0.5	1.33333
33	1108	8.7	2.35	9.3	7	2.735	58	42	0.775	1.96	244.9	13.6	15.2	11	13.2667	2.3	1.8	2	2.03333
34	3605	3	3.85	3.1	2.5	1.245	81	19	0.695	0.55	NA
35	1709	7.2	6.55	9	8.25	3.1	62	38	0.77	2.33	22	5.5	13	9	9.16667	1.2	1.2	1.2	1.2
						1.63588	62.3529	37.6471	0.589853	1.04603	10 feeding trails

## Sheet: 30.07
		Biomass Rank					Seagrass Species %		Species Biomass (g)
Number	Quadrat	1	2	3	4	Total (g)	HO	HU	HO	HU	Length (cm)	Width (cm)			Average	Depth (cm)			Average
1	0045	3.1	2.2	2.8	1.95	1.005	60	40	0.595	0.41	43.1	14.1	16.1	12	14.0667	1	1.2	1.8	1.33333
2	0435	4.25	4.5	4	3.75	1.65	70	30	0.625	1.025	129	24.8	26	18	22.9333	1.1	1	1	1.03333
3	1127	5.5	3.9	4.75	3.5	1.765	50	50	0.715	1.05	NA
4	1335	7	6.75	8.4	7.75	2.99	50	50	0.765	2.225	NA
5	1430	8	7.9	7.3	8.5	3.17	40	60	0.67	2.5	40.8	15.5	13.1	12.2	13.6	1.5	1	1	1.16667
6	1439	5.2	4.2	5.25	4.25	1.89	85	15	0.79	1.1	112.5	17.3	17	12.7	15.6667	2.4	2.6	2.1	2.36667
7	1548	1.7	2.5	4.5	4	1.27	85	15	0.6	0.67	114	15.7	14.6	14.3	14.8667	1.8	1.8	1.8	1.8
8	2047	2.2	1.25	3.2	2.45	0.91	95	5	0.575	0.335	NA
9	2443	6.1	5.3	1.5	7.4	2.03	35	65	0.33	1.7	NA
10	3043	2.95	3.5	4.1	4.5	1.505	75	25	0.665	0.84	102.3	16.3	14.4	13.5	14.7333	2.6	2.1	2.1	2.26667
11	3232	4.5	4.4	4	7.5	2.04	50	50	0.79	1.25	79.9	14.5	25.4	15.5	18.4667	1	1	1	1
12	3826	7	6.5	9.4	7.6	3.05	55	45	0.78	2.27	113.5	17	17	14.9	16.3	1.7	1.7	1	1.46667
13	4832	3.5	6	6.1	7.1	2.27	25	75	0.62	1.65	NA
14	0002	2.5	2.25	2.3	5.7	1.275	90	10	0.75	0.525	NA
15	0820	3.25	3.25	2.25	1.15	0.99	90	10	0.625	0.365	112	20.1	21	16.5	19.2	2.5	2.5	2	2.33333
16	1321	2.75	2.3	8.7	2.2	1.595	60	40	0.73	0.865	NA
17	1807	2.1	1.4	3.6	2.1	0.92	95	5	0.53	0.39	NA
18	1903	1.85	3.9	4.9	2.75	1.34	97	3	0.68	0.66	NA
19	3222	8.9	7.5	9	8	3.34	60	40	0.89	2.45	NA
20	3309	7.5	9.4	8	8.7	3.36	45	55	0.84	2.52	111.6	12	14	14.5	13.5	0.7	0.7	0.5	0.633333
						1.91825	65.6	34.4	0.67825	1.24	10 feeding trails

## Sheet: 29.08
		Biomass Rank					Seagrass Species %		Species Biomass (g)
Number	Quadrat	1	2	3	4	Total (g)	HO	HU	HO	HU	Length (cm)	Width (cm)			Average	Depth (cm)			Average
1	0616	8.5	7.75	7.75	7.75	3.175	50	50	0.725	2.45	103	19	19	21.5	19.8333	2.5	3.1	2.5	2.7
2	0117	7.25	8.25	8.9	9.1	3.35	50	50	0.515	2.835	132.5	12.1	16	10.2	12.7667	1.5	2.5	3	2.33333
3	0421	7.1	8.2	7.5	6.6	2.94	50	50	0.655	2.285	NA
4	0828	7.25	6.1	8.25	6.4	2.8	50	50	0.7	2.1	217	18.5	11	9	12.8333	1	1.5	1.5	1.33333
5	0230	8.8	4.6	6.75	3.45	2.36	50	50	0.59	1.77	NA
6	0331	2.9	3.6	3.75	4.3	1.455	70	30	0.705	0.75	NA
7	0132	2.8	3.5	3.1	3.8	1.32	85	15	0.725	0.595	NA
8	0942	4.25	6.75	6.25	5.6	2.285	70	30	0.685	1.6	NA
9	0249	8	7.5	8	5.9	2.94	30	70	0.59	2.35	NA
10	1206	5.4	6.2	5.9	6.75	2.425	70	30	0.575	1.85	140.2	16	16.5	14	15.5	3.5	3.5	4	3.66667
11	2012	3.25	3.4	6.9	7	2.055	45	55	0.755	1.3	1207.7	12	13.1	12	12.3667	3.5	4	4	3.83333
12	2013	6.1	6.1	5.95	6.75	2.49	60	40	0.665	1.825	NA
13	2501	6.1	6.55	7.5	7.2	2.735	45	55	0.495	2.24	NA
14	2705	2.25	3.9	5.3	6.7	1.815	50	50	0.515	1.3	187.9	13	15.5	10.5	13	1	1.5	1.5	1.33333
15	4001	6.7	7.35	7.25	6.5	2.78	45	55	0.53	2.25	38.6	8.6	9.5	10	9.36667	2.5	2	2.5	2.33333
16	4008	4.6	5.1	5.75	4.9	2.035	55	45	0.585	1.45	235.5	13.6	10.5	17.6	13.9	2.5	2.5	3.5	2.83333
17	4311	8.9	8.25	8.1	8.75	3.4	40	60	0.735	2.665	NA
18	1536	7.2	7.75	7.5	8.2	3.065	50	50	0.715	2.35	NA
19	1636	9	8.9	8.9	9	3.58	35	65	0.76	2.82	NA
20	2923	2.75	2.6	2.2	1.55	0.91	80	20	0.645	0.265	NA
21	3823	2.7	3.6	3	2.1	1.14	65	35	0.67	0.47	NA
22	4140	5.15	5.8	4.75	4.9	2.06	60	40	0.71	1.35	NA
23	4130	3.6	4.7	7.3	6.45	2.205	60	40	0.68	1.525	NA
24	4429	6.25	5.75	6.3	2.6	2.09	60	40	0.69	1.4	NA
25	4431	7.7	3.2	7.75	6.15	2.48	45	55	0.63	1.85	NA
26	4438	4.1	8.25	7.3	6.95	2.66	65	35	0.69	1.97	NA
27	4538	7.2	4.5	9.1	9.2	3	50	50	0.745	2.255	NA
28	2435	3.85	2.75	3.25	3.25	1.31	50	50		1.31	NA
29	2437	7.75	8.85	8.5	8.5	3.36	35	65	0.64	2.72	NA
30	2518	7.2	7.15	7.25	9	3.06	45	55	0.73	2.33	103.2	13.5	8	8	9.83333	2	2.5	2	2.16667
						2.44267	53.8333	46.1667	0.656897	1.80767	9 feeding trails
Comments:		very high epiphyte loading on entire meadow; sand dumping on site - looks like dugongs had a hard time to excavate the seagrass

## Sheet: Biomass
Date	Biomass
03.06.2012	2.615
03.06.2012	2.725
03.06.2012	0.18
03.06.2012	2.85
03.06.2012	1.975
03.06.2012	0.525
03.06.2012	0.72
03.06.2012	1.58
03.06.2012	1.675
03.06.2012	1.665
03.06.2012	1.105
03.06.2012	1.84
03.06.2012	2.47
03.06.2012	3.68
03.06.2012	3.32
03.06.2012	0.735
03.06.2012	3.135
03.06.2012	1.08
03.06.2012	0.35
03.06.2012	0.845
03.06.2012	0.735
02.07.2012	0.86
02.07.2012	0.815
02.07.2012	2.855
02.07.2012	1.95
02.07.2012	0.67
02.07.2012	0.72
02.07.2012	1.2
02.07.2012	1.18
02.07.2012	0.72
02.07.2012	3.12
02.07.2012	0.95
02.07.2012	2.9
02.07.2012	0.89
02.07.2012	2.255
02.07.2012	1.24
02.07.2012	1.635
02.07.2012	1.025
02.07.2012	0.94
02.07.2012	1.14
02.07.2012	2.915
02.07.2012	1.41
02.07.2012	2.27
02.07.2012	0.055
02.07.2012	0.03
02.07.2012	0.08
02.07.2012	2.285
02.07.2012	0.91
02.07.2012	2.735
02.07.2012	1.245
02.07.2012	3.1
30.07.2012	1.005
30.07.2012	1.65
30.07.2012	1.765
30.07.2012	2.99
30.07.2012	3.17
30.07.2012	1.89
30.07.2012	1.27
30.07.2012	0.91
30.07.2012	2.03
30.07.2012	1.505
30.07.2012	2.04
30.07.2012	3.05
30.07.2012	2.27
30.07.2012	1.275
30.07.2012	0.99
30.07.2012	1.595
30.07.2012	0.92
30.07.2012	1.34
30.07.2012	3.34
30.07.2012	3.36
29.08.2012	3.175
29.08.2012	3.35
29.08.2012	2.94
29.08.2012	2.8
29.08.2012	2.36
29.08.2012	1.455
29.08.2012	1.32
29.08.2012	2.285
29.08.2012	2.94
29.08.2012	2.425
29.08.2012	2.055
29.08.2012	2.49
29.08.2012	2.735
29.08.2012	1.815
29.08.2012	2.78
29.08.2012	2.035
29.08.2012	3.4
29.08.2012	3.065
29.08.2012	3.58
29.08.2012	0.91
29.08.2012	1.14
29.08.2012	2.06
29.08.2012	2.205
29.08.2012	2.09
29.08.2012	2.48
29.08.2012	2.66
29.08.2012	3
29.08.2012	3.36
29.08.2012	3.06

## Sheet: Species Percent
Date	Species	Percent.Cover		HO	HU
03.06.2012	HO	80		80	20
03.06.2012	HO	65		65	35
03.06.2012	HO	40		40	60
03.06.2012	HO	50		50	50
03.06.2012	HO	70		70	30
03.06.2012	HO	99		99	1
03.06.2012	HO	60		60	40
03.06.2012	HO	60		60	40
03.06.2012	HO	70		70	30
03.06.2012	HO	75		75	25
03.06.2012	HO	77		77	23
03.06.2012	HO	55		55	45
03.06.2012	HO	65		65	35
03.06.2012	HO	50		50	50
03.06.2012	HO	40		40	60
03.06.2012	HO	98		98	2
03.06.2012	HO	40		40	60
03.06.2012	HO	80		80	20
03.06.2012	HO	95		95	5
03.06.2012	HO	95		95	5
03.06.2012	HO	95		95	5
03.06.2012	HU	20		70	30
03.06.2012	HU	35		85	15
03.06.2012	HU	60		49	51
03.06.2012	HU	50		98	2
03.06.2012	HU	30		99	1
03.06.2012	HU	1		96	4
03.06.2012	HU	40		81	19
03.06.2012	HU	40		80	20
03.06.2012	HU	30		97	3
03.06.2012	HU	25		50	50
03.06.2012	HU	23		70	30
03.06.2012	HU	45		30	70
03.06.2012	HU	35		75	25
03.06.2012	HU	50		54	46
03.06.2012	HU	60		75	25
03.06.2012	HU	2		25	75
03.06.2012	HU	60		90	10
03.06.2012	HU	20		97	3
03.06.2012	HU	5		86	14
03.06.2012	HU	5		50	50
03.06.2012	HU	5		52	48
02.07.2012	HO	70		60	40
02.07.2012	HO	85		0	100
02.07.2012	HO	49		0	100
02.07.2012	HO	98		45	55
02.07.2012	HO	99		45	55
02.07.2012	HO	96		90	10
02.07.2012	HO	81		58	42
02.07.2012	HO	80		81	19
02.07.2012	HO	97		62	38
02.07.2012	HO	50		60	40
02.07.2012	HO	70		70	30
02.07.2012	HO	30		50	50
02.07.2012	HO	75		50	50
02.07.2012	HO	54		40	60
02.07.2012	HO	75		85	15
02.07.2012	HO	25		85	15
02.07.2012	HO	90		95	5
02.07.2012	HO	97		35	65
02.07.2012	HO	86		75	25
02.07.2012	HO	50		50	50
02.07.2012	HO	52		55	45
02.07.2012	HO	60		25	75
02.07.2012	HO	0		90	10
02.07.2012	HO	0		90	10
02.07.2012	HO	45		60	40
02.07.2012	HO	45		95	5
02.07.2012	HO	90		97	3
02.07.2012	HO	58		60	40
02.07.2012	HO	81		45	55
02.07.2012	HO	62		50	50
02.07.2012	HU	30		50	50
02.07.2012	HU	15		50	50
02.07.2012	HU	51		50	50
02.07.2012	HU	2		50	50
02.07.2012	HU	1		70	30
02.07.2012	HU	4		85	15
02.07.2012	HU	19		70	30
02.07.2012	HU	20		30	70
02.07.2012	HU	3		70	30
02.07.2012	HU	50		45	55
02.07.2012	HU	30		60	40
02.07.2012	HU	70		45	55
02.07.2012	HU	25		50	50
02.07.2012	HU	46		45	55
02.07.2012	HU	25		55	45
02.07.2012	HU	75		40	60
02.07.2012	HU	10		50	50
02.07.2012	HU	3		35	65
02.07.2012	HU	14		80	20
02.07.2012	HU	50		65	35
02.07.2012	HU	48		60	40
02.07.2012	HU	40		60	40
02.07.2012	HU	100		60	40
02.07.2012	HU	100		45	55
02.07.2012	HU	55		65	35
02.07.2012	HU	55		50	50
02.07.2012	HU	10		35	65
02.07.2012	HU	42		45	55
02.07.2012	HU	19
02.07.2012	HU	38
30.07.2012	HO	60
30.07.2012	HO	70
30.07.2012	HO	50
30.07.2012	HO	50
30.07.2012	HO	40
30.07.2012	HO	85
30.07.2012	HO	85
30.07.2012	HO	95
30.07.2012	HO	35
30.07.2012	HO	75
30.07.2012	HO	50
30.07.2012	HO	55
30.07.2012	HO	25
30.07.2012	HO	90
30.07.2012	HO	90
30.07.2012	HO	60
30.07.2012	HO	95
30.07.2012	HO	97
30.07.2012	HO	60
30.07.2012	HO	45
30.07.2012	HU	40
30.07.2012	HU	30
30.07.2012	HU	50
30.07.2012	HU	50
30.07.2012	HU	60
30.07.2012	HU	15
30.07.2012	HU	15
30.07.2012	HU	5
30.07.2012	HU	65
30.07.2012	HU	25
30.07.2012	HU	50
30.07.2012	HU	45
30.07.2012	HU	75
30.07.2012	HU	10
30.07.2012	HU	10
30.07.2012	HU	40
30.07.2012	HU	5
30.07.2012	HU	3
30.07.2012	HU	40
30.07.2012	HU	55
29.08.2012	HO	50
29.08.2012	HO	50
29.08.2012	HO	50
29.08.2012	HO	50
29.08.2012	HO	50
29.08.2012	HO	70
29.08.2012	HO	85
29.08.2012	HO	70
29.08.2012	HO	30
29.08.2012	HO	70
29.08.2012	HO	45
29.08.2012	HO	60
29.08.2012	HO	45
29.08.2012	HO	50
29.08.2012	HO	45
29.08.2012	HO	55
29.08.2012	HO	40
29.08.2012	HO	50
29.08.2012	HO	35
29.08.2012	HO	80
29.08.2012	HO	65
29.08.2012	HO	60
29.08.2012	HO	60
29.08.2012	HO	60
29.08.2012	HO	45
29.08.2012	HO	65
29.08.2012	HO	50
29.08.2012	HO	35
29.08.2012	HO	45
29.08.2012	HU	50
29.08.2012	HU	50
29.08.2012	HU	50
29.08.2012	HU	50
29.08.2012	HU	50
29.08.2012	HU	30
29.08.2012	HU	15
29.08.2012	HU	30
29.08.2012	HU	70
29.08.2012	HU	30
29.08.2012	HU	55
29.08.2012	HU	40
29.08.2012	HU	55
29.08.2012	HU	50
29.08.2012	HU	55
29.08.2012	HU	45
29.08.2012	HU	60
29.08.2012	HU	50
29.08.2012	HU	65
29.08.2012	HU	20
29.08.2012	HU	35
29.08.2012	HU	40
29.08.2012	HU	40
29.08.2012	HU	40
29.08.2012	HU	55
29.08.2012	HU	35
29.08.2012	HU	50
29.08.2012	HU	65
29.08.2012	HU	55

## Sheet: Species Biomass
Date	Species	Biomass		HO	HU
03.06.2012	HO	0.08		0.68	1.935
03.06.2012	HO	0.305		0.705	2.02
03.06.2012	HO	0.435		0.08	0.1
03.06.2012	HO	0.475		0.61	2.24
03.06.2012	HO	0.595		0.65	1.325
03.06.2012	HO	0.6		0.475	0.05
03.06.2012	HO	0.61		0.435	0.285
03.06.2012	HO	0.65		0.8	0.78
03.06.2012	HO	0.65		0.9	0.775
03.06.2012	HO	0.68		0.97	0.695
03.06.2012	HO	0.705		0.595	0.51
03.06.2012	HO	0.705		0.79	1.05
03.06.2012	HO	0.725		0.76	1.71
03.06.2012	HO	0.76		0.8	2.88
03.06.2012	HO	0.77		0.6	2.72
03.06.2012	HO	0.79		0.705	0.03
03.06.2012	HO	0.8		0.725	2.41
03.06.2012	HO	0.8		0.83	0.25
03.06.2012	HO	0.83		0.305	0.045
03.06.2012	HO	0.9		0.77	0.075
03.06.2012	HO	0.97		0.65	0.085
03.06.2012	HU	0.03		0.645	0.215
03.06.2012	HU	0.045		0.675	0.14
03.06.2012	HU	0.05		0.655	2.2
03.06.2012	HU	0.075		0.15	1.8
03.06.2012	HU	0.085		0.665	0.005
03.06.2012	HU	0.1		0.675	0.045
03.06.2012	HU	0.25		0.56	0.64
03.06.2012	HU	0.285		0.8	0.38
03.06.2012	HU	0.51		0.7	0.02
03.06.2012	HU	0.695		0.51	2.61
03.06.2012	HU	0.775		0.595	0.355
03.06.2012	HU	0.78		0.8	2.1
03.06.2012	HU	1.05		0.68	0.21
03.06.2012	HU	1.325		0.725	1.53
03.06.2012	HU	1.71		0.685	0.555
03.06.2012	HU	1.935		0.43	1.205
03.06.2012	HU	2.02		0.775	0.25
03.06.2012	HU	2.24		0.8	0.14
03.06.2012	HU	2.41		0.73	0.41
03.06.2012	HU	2.72		0.715	2.2
03.06.2012	HU	2.88		0.35	1.06
02.07.2012	HO	0		0.68	1.59
02.07.2012	HO	0		0	0.055
02.07.2012	HO	0.02		0	0.03
02.07.2012	HO	0.15		0.02	0.06
02.07.2012	HO	0.35		0.635	1.65
02.07.2012	HO	0.43		0.76	0.15
02.07.2012	HO	0.51		0.775	1.96
02.07.2012	HO	0.56		0.695	0.55
02.07.2012	HO	0.595		0.77	2.33
02.07.2012	HO	0.635		0.595	0.41
02.07.2012	HO	0.645		0.625	1.025
02.07.2012	HO	0.655		0.715	1.05
02.07.2012	HO	0.665		0.765	2.225
02.07.2012	HO	0.675		0.67	2.5
02.07.2012	HO	0.675		0.79	1.1
02.07.2012	HO	0.68		0.6	0.67
02.07.2012	HO	0.68		0.575	0.335
02.07.2012	HO	0.685		0.33	1.7
02.07.2012	HO	0.695		0.665	0.84
02.07.2012	HO	0.7		0.79	1.25
02.07.2012	HO	0.715		0.78	2.27
02.07.2012	HO	0.725		0.62	1.65
02.07.2012	HO	0.73		0.75	0.525
02.07.2012	HO	0.76		0.625	0.365
02.07.2012	HO	0.77		0.73	0.865
02.07.2012	HO	0.775		0.53	0.39
02.07.2012	HO	0.775		0.68	0.66
02.07.2012	HO	0.8		0.89	2.45
02.07.2012	HO	0.8		0.84	2.52
02.07.2012	HO	0.8		0.725	2.45
02.07.2012	HU	0.005		0.515	2.835
02.07.2012	HU	0.02		0.655	2.285
02.07.2012	HU	0.03		0.7	2.1
02.07.2012	HU	0.045		0.59	1.77
02.07.2012	HU	0.055		0.705	0.75
02.07.2012	HU	0.06		0.725	0.595
02.07.2012	HU	0.14		0.685	1.6
02.07.2012	HU	0.14		0.59	2.35
02.07.2012	HU	0.15		0.575	1.85
02.07.2012	HU	0.21		0.755	1.3
02.07.2012	HU	0.215		0.665	1.825
02.07.2012	HU	0.25		0.495	2.24
02.07.2012	HU	0.355		0.515	1.3
02.07.2012	HU	0.38		0.53	2.25
02.07.2012	HU	0.41		0.585	1.45
02.07.2012	HU	0.55		0.735	2.665
02.07.2012	HU	0.555		0.715	2.35
02.07.2012	HU	0.64		0.76	2.82
02.07.2012	HU	1.06		0.645	0.265
02.07.2012	HU	1.205		0.67	0.47
02.07.2012	HU	1.53		0.71	1.35
02.07.2012	HU	1.59		0.68	1.525
02.07.2012	HU	1.65		0.69	1.4
02.07.2012	HU	1.8		0.63	1.85
02.07.2012	HU	1.96		0.69	1.97
02.07.2012	HU	2.1		0.745	2.255
02.07.2012	HU	2.2		0.64	2.72
02.07.2012	HU	2.2		0.73	2.33
02.07.2012	HU	2.33
02.07.2012	HU	2.61
30.07.2012	HO	0.33
30.07.2012	HO	0.53
30.07.2012	HO	0.575
30.07.2012	HO	0.595
30.07.2012	HO	0.6
30.07.2012	HO	0.62
30.07.2012	HO	0.625
30.07.2012	HO	0.625
30.07.2012	HO	0.665
30.07.2012	HO	0.67
30.07.2012	HO	0.68
30.07.2012	HO	0.715
30.07.2012	HO	0.73
30.07.2012	HO	0.75
30.07.2012	HO	0.765
30.07.2012	HO	0.78
30.07.2012	HO	0.79
30.07.2012	HO	0.79
30.07.2012	HO	0.84
30.07.2012	HO	0.89
30.07.2012	HU	0.335
30.07.2012	HU	0.365
30.07.2012	HU	0.39
30.07.2012	HU	0.41
30.07.2012	HU	0.525
30.07.2012	HU	0.66
30.07.2012	HU	0.67
30.07.2012	HU	0.84
30.07.2012	HU	0.865
30.07.2012	HU	1.025
30.07.2012	HU	1.05
30.07.2012	HU	1.1
30.07.2012	HU	1.25
30.07.2012	HU	1.65
30.07.2012	HU	1.7
30.07.2012	HU	2.225
30.07.2012	HU	2.27
30.07.2012	HU	2.45
30.07.2012	HU	2.5
30.07.2012	HU	2.52
29.08.2012	HO	0.495
29.08.2012	HO	0.515
29.08.2012	HO	0.515
29.08.2012	HO	0.53
29.08.2012	HO	0.575
29.08.2012	HO	0.585
29.08.2012	HO	0.59
29.08.2012	HO	0.59
29.08.2012	HO	0.63
29.08.2012	HO	0.64
29.08.2012	HO	0.645
29.08.2012	HO	0.655
29.08.2012	HO	0.665
29.08.2012	HO	0.67
29.08.2012	HO	0.68
29.08.2012	HO	0.685
29.08.2012	HO	0.69
29.08.2012	HO	0.69
29.08.2012	HO	0.7
29.08.2012	HO	0.705
29.08.2012	HO	0.71
29.08.2012	HO	0.715
29.08.2012	HO	0.725
29.08.2012	HO	0.725
29.08.2012	HO	0.73
29.08.2012	HO	0.735
29.08.2012	HO	0.745
29.08.2012	HO	0.755
29.08.2012	HO	0.76
29.08.2012	HU	0.265
29.08.2012	HU	0.47
29.08.2012	HU	0.595
29.08.2012	HU	0.75
29.08.2012	HU	1.3
29.08.2012	HU	1.3
29.08.2012	HU	1.35
29.08.2012	HU	1.4
29.08.2012	HU	1.45
29.08.2012	HU	1.525
29.08.2012	HU	1.6
29.08.2012	HU	1.77
29.08.2012	HU	1.825
29.08.2012	HU	1.85
29.08.2012	HU	1.85
29.08.2012	HU	1.97
29.08.2012	HU	2.1
29.08.2012	HU	2.24
29.08.2012	HU	2.25
29.08.2012	HU	2.255
29.08.2012	HU	2.285
29.08.2012	HU	2.33
29.08.2012	HU	2.35
29.08.2012	HU	2.35
29.08.2012	HU	2.45
29.08.2012	HU	2.665
29.08.2012	HU	2.72
29.08.2012	HU	2.82
29.08.2012	HU	2.835
