# Supplementary material for: Dugong dugon feeding in tropical Australian seagrass meadows: implications for conservation planning
Source: PeerJ. 2016 Jul 7;4:e2194. doi: 10.7717/peerj.2194 (PMC4941767; doi:10.7717/peerj.2194)
Supplement: Supplemental Information 6 [file peerj-04-2194-s008.xlsx]

## Sheet: HU
Wet.Above	Wet.Below	Dry.Above	Dry.Below		Sample	Above	Below	Collected
NA	NA	0.027	0.039		1	0.281	1.15	2012-03-20
NA	NA	0.006	0.049		2			2012-03-20
NA	NA	0.01	0.034		3			2012-03-20
NA	NA	0.039	0.236		4			2012-03-20
NA	NA	0.005	0.011		5			2012-03-20
NA	NA	0.051	0.243
NA	NA	0.012	0.053
NA	NA	0.005	0.018
NA	NA	0.012	0.058
NA	NA	0.015	0.064
NA	NA	0.03	0.093
NA	NA	0.026	0.088
NA	NA	0.005	0.017
NA	NA	0.019	0.073
NA	NA	0.006	0.006
NA	NA	0.005	0.025
NA	NA	0.008	0.043

## Sheet: HO
Wet.Above	Wet.Below	Wet.Above	Wet.Below		Sample	Above	Below	Collected
NA	NA	0.005	0.007		1	0.159	0.2011	2012-03-20
NA	NA	0.001	0.0001		2			2012-03-20
NA	NA	0.02	0.021
NA	NA	0.003	0.007
NA	NA	0.012	0.024
NA	NA	0.01	0.016
NA	NA	0.006	0.011
NA	NA	0.021	0.014
NA	NA	0.001	0.002
NA	NA	0.035	0.055
NA	NA	0.006	0.005
NA	NA	0.026	0.025
NA	NA	0.013	0.014

## Sheet: Data
					Wet Weight (g)		Dry Weight (g)
Collected	Processed	Dried	Sample	Species	Above	Below	Above	Below
2012-03-20	2012-07-25	2012-07-27	YP-1	HU	NA	NA	0.027	0.039
2012-03-20	2012-07-25	2012-07-27	YP-1	HO	NA	NA	0.005	0.007
2012-03-20	2012-07-25	2012-07-27	YP-2	HU	NA	NA	0.006	0.049
2012-03-20	2012-07-25	2012-07-27	YP-2	HO	NA	NA	0.001	0.0001
2012-03-20	2012-07-25	2012-07-27	YP-3	HU	NA	NA	0.01	0.034
2012-03-20	2012-07-25	2012-07-27	YP-3	HO	NA	NA	0.02	0.021
2012-03-20	2012-07-25	2012-07-27	YP-4	HU	NA	NA	0.039	0.236
2012-03-20	2012-07-25	2012-07-27	YP-4	HO	NA	NA	0.003	0.007
2012-03-20	2012-07-25	2012-07-27	YP-5	HU	NA	NA	0.005	0.011
2012-03-20	2012-07-25	2012-07-27	YP-5	HO	NA	NA	0.012	0.024
2012-03-20	2012-07-25	2012-07-27	YP-6	HU	NA	NA	0.051	0.243
2012-03-20	2012-07-25	2012-07-27	YP-7	HU	NA	NA	0.012	0.053
2012-03-20	2012-07-25	2012-07-27	YP-7	HO	NA	NA	0.01	0.016
2012-03-20	2012-07-25	2012-07-27	YP-8	HU	NA	NA	0.005	0.018
2012-03-20	2012-07-25	2012-07-27	YP-8	HO	NA	NA	0.006	0.011
2012-03-20	2012-07-25	2012-07-27	YP-9	HU	NA	NA	0.012	0.058
2012-03-20	2012-07-25	2012-07-27	YP-9	HO	NA	NA	0.021	0.014
2012-03-20	2012-07-25	2012-07-27	YP-10	HU	NA	NA	0.015	0.064
2012-03-20	2012-07-25	2012-07-27	YP-11	HU	NA	NA	0.03	0.093
2012-03-20	2012-07-25	2012-07-27	YP-12	HU	NA	NA	0.026	0.088
2012-03-20	2012-07-25	2012-07-27	YP-13	HU	NA	NA	0.005	0.017
2012-03-20	2012-07-25	2012-07-27	YP-13	HO	NA	NA	0.001	0.002
2012-03-20	2012-07-25	2012-07-27	YP-14	HU	NA	NA	0.019	0.073
2012-03-20	2012-07-25	2012-07-27	YP-14	HO	NA	NA	0.035	0.055
2012-03-20	2012-07-25	2012-07-27	YP-15	HU	NA	NA	0.006	0.006
2012-03-20	2012-07-25	2012-07-27	YP-16	HU	NA	NA	0.005	0.025
2012-03-20	2012-07-25	2012-07-27	YP-17	HO	NA	NA	0.006	0.005
2012-03-20	2012-07-25	2012-07-27	YP-18	HO	NA	NA	0.026	0.025
2012-03-20	2012-07-25	2012-07-27	YP-19	HO	NA	NA	0.013	0.014
2012-03-20	2012-07-25	2012-07-27	YP-20	HU	NA	NA	0.008	0.043
