# Supplementary material for: Dugong dugon feeding in tropical Australian seagrass meadows: implications for conservation planning
Source: PeerJ. 2016 Jul 7;4:e2194. doi: 10.7717/peerj.2194 (PMC4941767; doi:10.7717/peerj.2194)
Supplement: Supplemental Information 8 [file peerj-04-2194-s010.xlsx]

## Sheet: HO
Wet.Above	Wet.Below	Dry.Above	Dry.Below		Sample	Above	Below	Collected
0.591	0.734	0.027	0.022		1	0.21	0.311	2012-04-04
0.661	1.877	0.028	0.076		2	0.22	0.322	2012-04-04
0.265	0.446	0.012	0.017		3	0.213	0.201	2012-04-04
0.593	0.72	0.024	0.024		4	0.206	0.227	2012-04-04
2.471	4.007	0.131	0.189		5	0.233	0.524	2012-07-01
2.001	4.796	0.096	0.187		6	0.213	0.38	2012-07-01
0.673	1.149	0.029	0.035		7	0.207	0.414	2012-07-01
2.147	3.121	0.083	0.092		8	0.226	0.335	2012-07-01
0.969	1.127	0.045	0.029
2.055	2.726	0.098	0.094
0.556	0.807	0.021	0.023
0.402	0.458	0.017	0.012
2.074	3.172	0.092	0.105
0.909	0.981	0.045	0.042
0.61	0.901	0.024	0.03
0.362	0.294	0.013	0.008
0.308	0.286	0.012	0.008
1.016	2.068	0.052	0.068
1.888	4.926	0.088	0.218
0.863	3.058	0.038	0.101
1.588	2.361	0.069	0.086
0.886	2.883	0.047	0.106
0.455	1.115	0.021	0.037
0.912	1.943	0.036	0.063
0.19	0.416	0.01	0.028
0.043	0.145	0.003	0.012
0.807	0.968	0.037	0.04
1.279	2.179	0.057	0.09
1.185	3.328	0.064	0.138
1.082	1.721	0.052	0.06
1.904	3.617	0.086	0.162
1.447	2.498	0.071	0.098
1.109	2.142	0.056	0.109
0.877	1.915	0.041	0.081
1.555	4.089	0.064	0.162
0.904	1.458	0.039	0.062

## Sheet: HU
Wet.Above	Wet.Below	Dry.Above	Dry.Below		Sample	Above	Below	Collected
0.077	0.134	0.007	0.016		1	0.091	0.226	2012-04-04
0.094	0.035	0.006	0.004		2	0.337	0.937	2012-07-01
0.264	0.204	0.033	0.059
0.15	0.527	0.014	0.053
0.392	0.844	0.031	0.094
0.062	0.541	0.016	0.052
0.294	0.521	0.036	0.045
0.026	0.077	0.006	0.013
0.171	1.137	0.026	0.151
0.363	0.878	0.028	0.073
0.175	0.697	0.019	0.079
0.199	0.192	0.022	0.029
0.239	0.495	0.02	0.062
0.546	1.526	0.049	0.183
0.495	0.809	0.049	0.085
0.617	1.792	0.066	0.165

## Sheet: CS
Wet.Above	Wet.Below	Dry.Above	Dry.Below		Sample	Above	Below	Collected
0.778	0.713	0.067	0.079		1	0.304	0.443	2012-04-04
0.852	1.277	0.062	0.111		2	0.267	0.396	2012-07-01
1.367	1.232	0.101	0.109		3	0.31	0.42	2012-07-01
0.148	0.071	0.012	0.004
0.607	1.333	0.062	0.14
0.301	0.172	0.054	0.049
0.423	0.735	0.043	0.095
0.597	0.755	0.049	0.077
0.629	0.762	0.069	0.077
0.741	1.174	0.083	0.139
0.352	0.168	0.064	0.035
1.284	1.498	0.149	0.241
0.602	0.486	0.066	0.103

## Sheet: TH
Wet.Above	Wet.Below	Dry.Above	Dry.Below		Sample	Above	Below	Date Collected
0.662	1.291	0.049	0.095		1	0.08	0.26	2012-07-01
0.381	1.626	0.031	0.165

## Sheet: Data
					Wet Weight (g)		Dry Weight (g)
Collected	Processed	Dried	Sample	Species	Above	Below	Above	Below
2012-04-04	2012-06-26	2012-06-28	MI-1	HO	0.591	0.734	0.027	0.022
2012-04-04	2012-06-26	2012-06-28	MI-1	HU	0.077	0.134	0.007	0.016
2012-04-04	2012-06-26	2012-06-28	MI-2	HO	0.661	1.877	0.028	0.076
2012-04-04	2012-06-26	2012-06-28	MI-3	HO	0.265	0.446	0.012	0.017
2012-04-04	2012-06-26	2012-06-28	MI-3	CS	0.778	0.713	0.067	0.079
2012-04-04	2012-06-26	2012-06-28	MI-4	HO	0.593	0.72	0.024	0.024
2012-04-04	2012-06-26	2012-06-28	MI-5	HO	2.471	4.007	0.131	0.189
2012-04-04	2012-06-26	2012-06-28	MI-5	HU	0.094	0.035	0.006	0.004
2012-04-04	2012-06-27	2012-06-29	MI-6	HO	2.001	4.796	0.096	0.187
2012-04-04	2012-06-27	2012-06-29	MI-7	HO	0.673	1.149	0.029	0.035
2012-04-04	2012-06-27	2012-06-29	MI-7	CS	0.852	1.277	0.062	0.111
2012-04-04	2012-06-27	2012-06-29	MI-8	HO	2.147	3.121	0.083	0.092
2012-04-04	2012-06-27	2012-06-29	MI-9	HO	0.969	1.127	0.045	0.029
2012-04-04	2012-06-29	2012-07-02	MI-10	HO	2.055	2.726	0.098	0.094
2012-04-04	2012-06-29	2012-07-02	MI-11	HO	0.556	0.807	0.021	0.023
2012-04-04	2012-06-29	2012-07-02	MI-11	CS	1.367	1.232	0.101	0.109
2012-04-04	2012-06-29	2012-07-02	MI-12	HO	0.402	0.458	0.017	0.012
2012-04-04	2012-06-29	2012-07-02	MI-13	HO	2.074	3.172	0.092	0.105
2012-04-04	2012-07-03	2012-07-05	MI-14	HO	0.909	0.981	0.045	0.042
2012-04-04	2012-07-03	2012-07-05	MI-14	HU	0.264	0.204	0.033	0.059
2012-04-04	2012-07-03	2012-07-05	MI-15	HO	0.61	0.901	0.024	0.03
2012-04-04	2012-07-03	2012-07-05	MI-15	HU	0.15	0.527	0.014	0.053
2012-04-04	2012-07-03	2012-07-05	MI-15	CS	0.148	0.071	0.012	0.004
2012-04-04	2012-07-03	2012-07-05	MI-16	HO	0.362	0.294	0.013	0.008
2012-04-04	2012-07-03	2012-07-05	MI-17	HO	0.308	0.286	0.012	0.008
2012-04-04	2012-07-03	2012-07-05	MI-17	CS	0.607	1.333	0.062	0.14
2012-04-04	2012-07-03	2012-07-05	MI-18	HO	1.016	2.068	0.052	0.068
2012-04-04	2012-07-03	2012-07-05	MI-18	HU	0.392	0.844	0.031	0.094
2012-07-01	2012-07-03	2012-07-05	MI-19	HO	1.888	4.926	0.088	0.218
2012-07-01	2012-07-03	2012-07-05	MI-19	HU	0.062	0.541	0.016	0.052
2012-07-01	2012-07-03	2012-07-05	MI-19	CS	0.301	0.172	0.054	0.049
2012-07-01	2012-07-03	2012-07-05	MI-20	HO	0.863	3.058	0.038	0.101
2012-07-01	2012-07-03	2012-07-05	MI-20	CS	0.423	0.735	0.043	0.095
2012-07-01	2012-07-03	2012-07-05	MI-21	HO	1.588	2.361	0.069	0.086
2012-07-01	2012-07-03	2012-07-05	MI-21	TH	0.662	1.291	0.049	0.095
2012-07-01	2012-07-03	2012-07-05	MI-22	HO	0.886	2.883	0.047	0.106
2012-07-01	2012-07-03	2012-07-05	MI-22	HU	0.294	0.521	0.036	0.045
2012-07-01	2012-07-03	2012-07-05	MI-22	CS	0.597	0.755	0.049	0.077
2012-07-01	2012-07-03	2012-07-05	MI-22	TH	0.381	1.626	0.031	0.165
2012-07-01	2012-07-03	2012-07-05	MI-23	HO	0.455	1.115	0.021	0.037
2012-07-01	2012-07-03	2012-07-05	MI-23	CS	0.629	0.762	0.069	0.077
2012-07-01	2012-07-03	2012-07-05	MI-24	HO	0.912	1.943	0.036	0.063
2012-07-01	2012-07-03	2012-07-05	MI-24	CS	0.741	1.174	0.083	0.139
2012-07-01	2012-07-04	2012-07-06	MI-25	HO	0.19	0.416	0.01	0.028
2012-07-01	2012-07-04	2012-07-06	MI-25	CS	0.352	0.168	0.064	0.035
2012-07-01	2012-07-04	2012-07-06	MI-26	HO	0.043	0.145	0.003	0.012
2012-07-01	2012-07-04	2012-07-06	MI-26	CS	1.284	1.498	0.149	0.241
2012-07-01	2012-07-04	2012-07-06	MI-27	HO	0.807	0.968	0.037	0.04
2012-07-01	2012-07-04	2012-07-06	MI-27	CS	0.602	0.486	0.066	0.103
2012-07-01	2012-07-04	2012-07-06	MI-28	HO	1.279	2.179	0.057	0.09
2012-07-01	2012-07-04	2012-07-06	MI-28	HU	0.026	0.077	0.006	0.013
2012-07-01	2012-07-04	2012-07-06	MI-29	HO	1.185	3.328	0.064	0.138
2012-07-01	2012-07-04	2012-07-06	MI-29	HU	0.171	1.137	0.026	0.151
2012-07-01	2012-07-04	2012-07-06	MI-30	HO	1.082	1.721	0.052	0.06
2012-07-01	2012-07-04	2012-07-06	MI-30	HU	0.363	0.878	0.028	0.073
2012-07-01	2012-07-04	2012-07-06	MI-31	HO	1.904	3.617	0.086	0.162
2012-07-01	2012-07-04	2012-07-06	MI-31	HU	0.175	0.697	0.019	0.079
2012-07-01	2012-07-04	2012-07-06	MI-32	HO	1.447	2.498	0.071	0.098
2012-07-01	2012-07-04	2012-07-06	MI-32	HU	0.199	0.192	0.022	0.029
2012-07-01	2012-07-04	2012-07-06	MI-33	HO	1.109	2.142	0.056	0.109
2012-07-01	2012-07-04	2012-07-06	MI-33	HU	0.239	0.495	0.02	0.062
2012-07-01	2012-07-04	2012-07-06	MI-34	HO	0.877	1.915	0.041	0.081
2012-07-01	2012-07-04	2012-07-06	MI-34	HU	0.546	1.526	0.049	0.183
2012-07-01	2012-07-04	2012-07-06	MI-35	HO	1.555	4.089	0.064	0.162
2012-07-01	2012-07-04	2012-07-06	MI-35	HU	0.495	0.809	0.049	0.085
2012-07-01	2012-07-04	2012-07-06	MI-36	HO	0.904	1.458	0.039	0.062
2012-07-01	2012-07-04	2012-07-06	MI-36	HU	0.617	1.792	0.066	0.165
