# Supplementary material for: Dugong dugon feeding in tropical Australian seagrass meadows: implications for conservation planning
Source: PeerJ. 2016 Jul 7;4:e2194. doi: 10.7717/peerj.2194 (PMC4941767; doi:10.7717/peerj.2194)
Supplement: Supplemental Information 9 [file peerj-04-2194-s011.xlsx]

## Sheet: HO
Wet.Above	Wet.Below	Dry.Above	Dry.Below		Sample	Above	Below	Date Collected
0.151	0.131	0.018	0.011		1	0.213	0.174	09/03/2012+16/05/2012
0.095	0.09	0.013	0.008
NA	NA	0.013	0.011
NA	NA	0.008	0.005
NA	NA	0.03	0.043
NA	NA	0.006	0.007
NA	NA	0.015	0.011
NA	NA	0.012	0.009
NA	NA	0.025	0.015
NA	NA	0.025	0.015
NA	NA	0.008	0.005
NA	NA	0.026	0.024
NA	NA	0.006	0.004
NA	NA	0.008	0.006

## Sheet: HU
Wet.Above	Wet.Below	Dry.Above	Dry.Below			Sample	Above	Below	Date Collected
0.126	0.296	0.019	0.068			1	0.225	0.509	2012-03-09
0.111	0.143	0.015	0.024			2	0.234	0.476	16/05/2012 + 09/03/2012
0.144	0.212	0.021	0.048
0.172	0.204	0.024	0.044
0.178	0.332	0.026	0.06
0.11	0.24	0.016	0.046
0.08	0.112	0.013	0.022
0.047	0.067	0.007	0.015
0.257	0.305	0.036	0.056
0.188	0.334	0.025	0.055
0.02	0.027	0.003	0.005
0.15	0.308	0.02	0.066
0.162	0.305	0.023	0.063
0.262	0.361	0.038	0.073
0.087	0.113	0.016	0.025
0.177	0.288	0.028	0.065
0.18	0.335	0.038	0.064
0.1	0.153	0.019	0.024
NA	NA	0.009	0.046
NA	NA	0.01	0.016
NA	NA	0.017	0.01
NA	NA	0.002	0.004
NA	NA	0.002	0.003
NA	NA	0.009	0.024
NA	NA	0.009	0.012
NA	NA	0.005	0.02
NA	NA	0.008	0.024
NA	NA	0.001	0.003

## Sheet: Data
					Wet Weight (g)		Dry Weight (g)
Collected	Processed	Dried	Sample	Species	Above	Below	Above	Below
2012-03-09	2012-04-12	2012-04-17	PL-1	HU	0.126	0.296	0.019	0.068
2012-03-09	2012-04-12	2012-04-17	PL-2	HU	0.111	0.143	0.015	0.024
2012-03-09	2012-04-12	2012-04-17	PL-2	HO	0.151	0.131	0.018	0.011
2012-03-09	2012-04-12	2012-04-17	PL-3	HU	0.144	0.212	0.021	0.048
2012-03-09	2012-04-12	2012-04-17	PL-4	HU	0.172	0.204	0.024	0.044
2012-03-09	2012-04-12	2012-04-17	PL-5	HU	0.178	0.332	0.026	0.06
2012-03-09	2012-04-13	2012-04-17	PL-6	HU	0.11	0.24	0.016	0.046
2012-03-09	2012-04-13	2012-04-17	PL-7	HU	0.08	0.112	0.013	0.022
2012-03-09	2012-03-22	2012-03-27	PL-8	HO	0.095	0.09	0.013	0.008
2012-03-09	2012-04-13	2012-04-17	PL-9	HU	0.047	0.067	0.007	0.015
2012-03-09	2012-04-13	2012-04-17	PL-10	HU	0.257	0.305	0.036	0.056
2012-03-09	2012-04-13	2012-04-17	PL-11	HU	0.188	0.334	0.025	0.055
2012-03-09	2012-04-13	2012-04-17	PL-12	HU	0.02	0.027	0.003	0.005
2012-03-09	2012-04-13	2012-04-17	PL-13	HU	0.15	0.308	0.02	0.066
2012-03-09	2012-04-12	2012-04-17	PL-14	HU	0.162	0.305	0.023	0.063
2012-03-09	2012-04-13	2012-04-17	PL-15	HU	0.262	0.361	0.038	0.073
2012-03-09	2012-04-12	2012-04-17	PL-16	HU	0.087	0.113	0.016	0.025
2012-03-09	2012-04-13	2012-04-17	PL-17	HU	0.177	0.288	0.028	0.065
2012-03-09	2012-03-22	2012-03-27	PL-18	HU	0.18	0.335	0.038	0.064
2012-03-09	2012-03-22	2012-03-27	PL-19	HU	0.1	0.153	0.019	0.024
2012-05-06	2012-07-24	2012-07-26	PL-20	HO	NA	NA	0.013	0.011
2012-05-06	2012-07-24	2012-07-26	PL-20	HU	NA	NA	0.009	0.046
2012-05-06	2012-07-24	2012-07-26	PL-21	HO	NA	NA	0.008	0.005
2012-05-06	2012-07-24	2012-07-26	PL-21	HU	NA	NA	0.01	0.016
2012-05-06	2012-07-24	2012-07-26	PL-22	HO	NA	NA	0.03	0.043
2012-05-06	2012-07-24	2012-07-26	PL-23	HU	NA	NA	0.017	0.01
2012-05-06	2012-07-24	2012-07-26	PL-24	HO	NA	NA	0.006	0.007
2012-05-06	2012-07-24	2012-07-26	PL-25	HO	NA	NA	0.015	0.011
2012-05-06	2012-07-24	2012-07-26	PL-25	HU	NA	NA	0.002	0.004
2012-05-16	2012-07-24	2012-07-26	PL-26	HO	NA	NA	0.012	0.009
2012-05-16	2012-07-24	2012-07-26	PL-26	HU	NA	NA	0.002	0.003
2012-05-16	2012-07-24	2012-07-26	PL-27	HO	NA	NA	0.025	0.015
2012-05-16	2012-07-24	2012-07-26	PL-27	HU	NA	NA	0.009	0.024
2012-05-16	2012-07-24	2012-07-26	PL-28	HO	NA	NA	0.025	0.015
2012-05-16	2012-07-24	2012-07-26	PL-29	HO	NA	NA	0.008	0.005
2012-05-16	2012-07-24	2012-07-26	PL-29	HU	NA	NA	0.009	0.012
2012-05-16	2012-07-24	2012-07-26	PL-30	HO	NA	NA	0.026	0.024
2012-05-16	2012-07-24	2012-07-26	PL-30	HU	NA	NA	0.005	0.02
2012-05-16	2012-07-24	2012-07-26	PL-31	HO	NA	NA	0.006	0.004
2012-05-16	2012-07-24	2012-07-26	PL-31	HU	NA	NA	0.008	0.024
2012-05-16	2012-07-24	2012-07-26	PL-32	HO	NA	NA	0.008	0.006
2012-05-16	2012-07-24	2012-07-26	PL-32	HU	NA	NA	0.001	0.003
